# Supplementary material
Source: PubMed Central journal article supplement (PMC6457152)

# Decision Tree Model

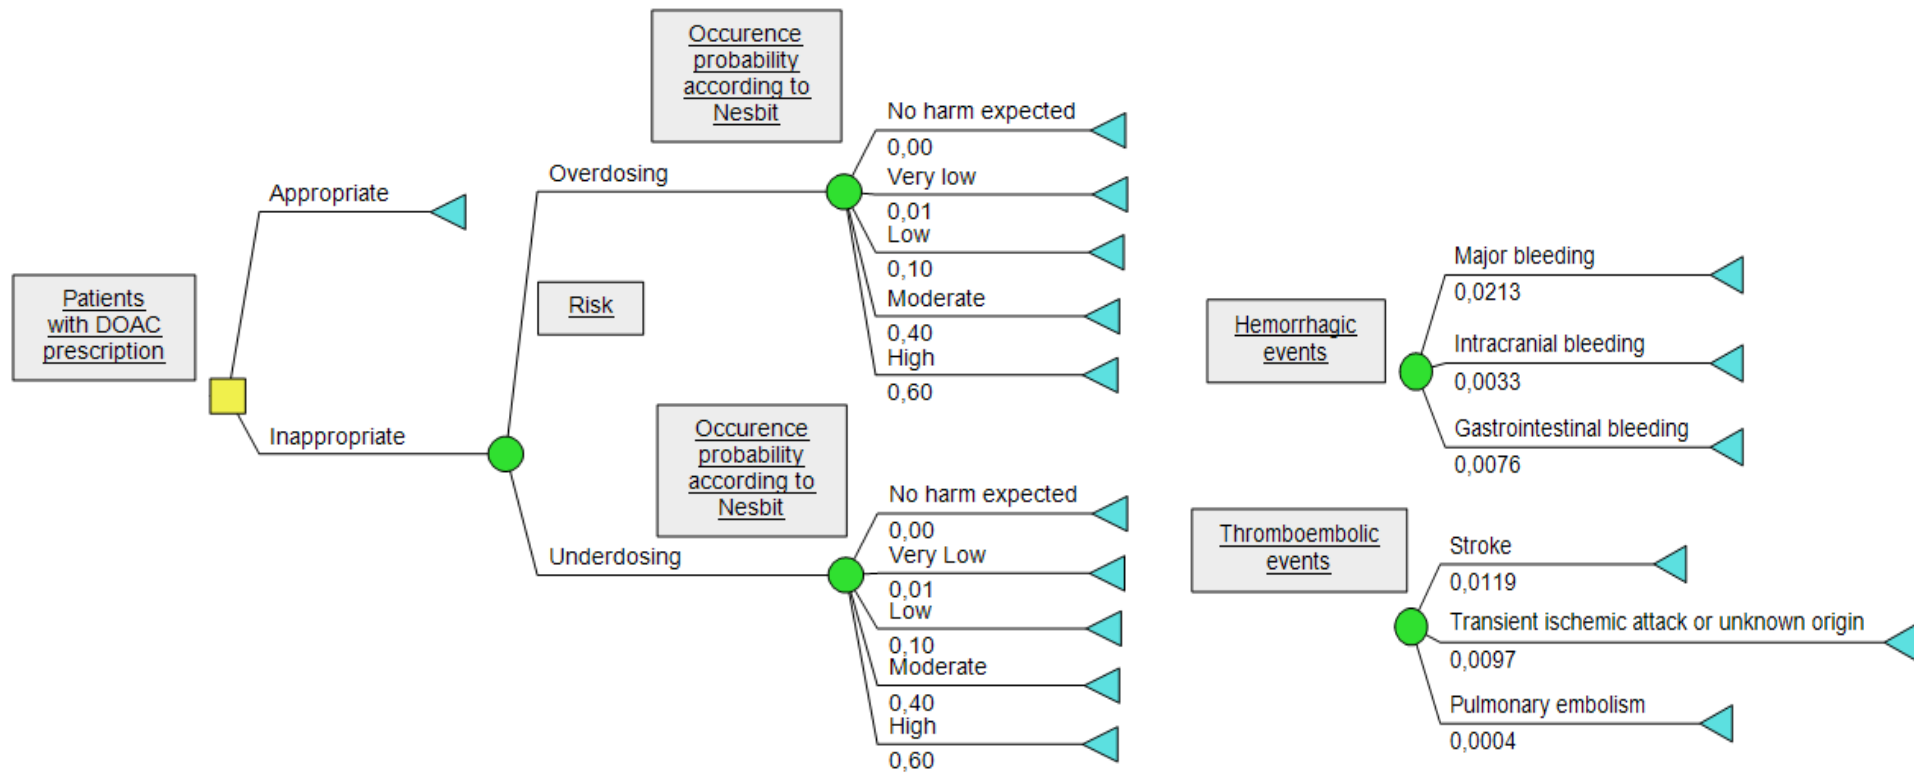

Supplement: ejhpharm-2016-001024supp001.pdf [file ejhpharm-2016-001024supp001.pdf]
